# Supplementary material for: Adjunctive Nutraceuticals for Depression: A Systematic Review and Meta-Analyses
Source: Atypon-hosted journal article supplement (doi:10.1176/appi.ajp.2016.15091228), 2016-04-26
Supplement: appi.ajp.2016.15091228.ds001.pdf [file appi.ajp.2016.15091228.ds001.pdf]

 


Psychiatry Online
